# Supplementary material for: Healthcare Waste Management in Nigeria: A Review
Source: MDPI journal article supplement (doi:10.3390/recycling7060087), 2022-11-21
Supplement: s1 [file s1]

## Supplementary Materials

1. Macaulay, B.M.; Odiase, F.M. Medical waste management practices in developing countries; A case study of health facilities in Akure, Nigeria. *Int. J. Environ. Waste Manag.* **2016**, *17*, 103–127.
2. Uwa, C.U. Assessment of healthcare waste management practices in Enugu Metropolis, Nigeria. *Int. J. Environ. Sci. Dev.* **2014**, *5*, 370–374.
3. Oyekale, A.S.; Oyekale, T.O. Healthcare waste management practices and safety indicators in Nigeria. *BMC Public Health* **2017**, *17*, 740.
4. Oli, A.N.; Ekejindu, C.C.; Adje, D.U.; Ezeobi, I.; Ejiofor, O.S.; Ibeh, C.C.; Ubajaka, C.F. Healthcare waste management in selected government and private hospitals in Southeast Nigeria. *Asian Pac. J. Trop. Biomed.* **2015**, *6*, 84–89.
5. Etim, M.A.; Academe, S.; Emenike, P.; Omole, D. Applications of multi-criteria decision approach in the assessment of medical waste management systems in Nigeria. *Sustainability* **2021**, *13*, 10914.
6. Baaki, T.K.; Baharum, M.R.; Akashah, F.W. Critical success factors of medical waste management in healthcare facilities in Nigeria: A case study. *J. Des. Built Environ.* **2017**, *17*, 18–35.
7. Awodele, O.; Adewoye, A.A.; Oparah, A.C. Assessment of medical waste management in seven hospitals in Lagos, Nigeria. *BMC Public Health* **2016**, *16*, 269.
8. Anozie, O.B.; Lawani, L.O.; Eze, J.N.; Mamah, E.J.; Onoh, R.C.; Ogah, E.O.; Umezurike, D.A.; Anozie, R.O. Knowledge, attitude and practice of healthcare managers to medical waste management and occupational safety practices: Findings from southeast, Nigeria. *J. Clin. Diagn. Res.* **2017**, *11*, 1C01–1C04.
9. Oteri, J.; Bawa, S.; Christopher, E.; Nsubuga, P.; Dieng, B.; Braka, F.; Shuaib, F. Potential for improving routine immunization waste management using measles vaccination campaign 2017 in Kebbi State, Nigeria. *Vaccine* **2021**, *39*, C60–C65.
10. Nwankwo, C. Knowledge and practice of waste management among hospital cleaners. *Occup. Med.* **2018**, *68*, 360–363.
11. Umegbolu, E.I.; Ozoejike, I.N. Management of solid healthcare wastes in some government healthcare facilities in Enugu State, Southeast Nigeria: A cross-sectional study. *Int. J. Community Med. Public Health* **2017**, *4*, 4031–4041.
12. Afolabi, A.S.; Agbabiaka, H.I.; Afon, A.O.; Akinbinu, A.A.; Adefisoye, E.A. Solid waste management practice in Obafemi Awolowo University Teaching Hospital Complex (OAUTHC), Ile-Ife Nigeria. *Manag. Environ. Qual. Int. J.* **2017**, *29*, 547–571.
13. Coker, A.O.; Sikiru, K.A.; Sridhar, M.K.C.; Sangodoyin, A.Y. Characterization and management of solid hospital wastes. In Proceedings of the 25th WEDC Conference: Integrated Development for Water Supply and Sanitation, Addis Ababa, Ethiopia, 1 January 1999.
14. Okechukwu, E.; Onyenwenyi, A. P170: Evaluation of knowledge and practices of hospital waste management in Nigeria: Implications for the control of healthcare associated infections. *Antimicrob. Resist. Infect. Control.* **2013**, *2*, P170.
15. Odewumi, S.G.; Onyemkpa, C.S. Characterization and Management of solid hospital waste—Comparative analysis of private and public institutions. *Eur. J. Sci. Res.* **2013**, *104*, 30–52.
16. Ojuolape, O.T.; Afon, A.O. Solid waste characterization in private health institutions: Empirical evidence from Ibadan metropolis. *Manag. Res. Pract.* **2016**, *8*, 50–60.
17. Ugwu, E.I.; Ekeleme, A.C.; Okolie, S.T.A.; Ibe, O.P.; Chieke, C.F.; Ibearugbulem, H.O.; Omeje, M.; Ede, A.N.; Awoyera, P.O.; Ugwu, E.C. Characterization of medical wastes from selected hospitals in Umuahia, Nigeria. *J. Phys. Conf. Ser.* **2019**, *1378*, 042058.
18. Abah, S.O.; Ohimain, E.I. Healthcare waste management in Nigeria: A case study. *J. Public Health Epidemiol.* **2011**, *3*, 99–110.
19. Oke, I.A.; Otun, J.A.; Adie, D.B.; Asani, M.A.; Lukman, S.; Ismail, A. Characterization and management of medical solid wastes from selected private hospitals in Ile-Ife, Nigeria. In *Solid Waste Management and Environmental Remediation*; Faerber, T., Herzog, J., Eds.; Nova science publishers: Hauppauge, NY, USA, 2009; Chapter 7, p. 38.
20. Idowu, I.; Alo, B.; Atherton, W.; Al khaddar, R. Profile of medical waste management in two healthcare facilities in Lagos, Nigeria: A case study. *Waste Manag. Res.* **2013**, *31*, 494–501.
21. Adedigba, M.A.; Nwhator, S.O.; Afon, A.; Abegunde, A.A.; Bamise, C.T. Assessment of dental waste management in a Nigerian tertiary hospital. *Waste Manag. Res.* **2010**, *28*, 769–777.
22. Chima, G.N.; Ezekwe, I.C.; Digha, N.O. An assessment of medical waste management in health institutions in Yenogoa, South-South Nigeria. *World Rev. Sci. Technol. Sust.* **2011**, *8*, 224–233.
23. Sawyerr, H.O.; Adeolu, A.T.; Salami, O.O.; Adejoh, P.O. Evaluation of biomedical waste in Kogi State University Teaching Hospital, Anyigba, Kogi state Nigeria. *Toxicol. Environ. Health Sci.* **2017**, *9*, 29–34.

24. Bassey, B.E.; Ben-Coker, M.O.; Aliyu, H.S.A. Characterization and Management of solid medical wastes in Federal Capital Territory, Abuja Nigeria. *Afr. Health Sci.* **2006**, *6*, 59–63.
25. Coker, A.O.; Sangodoyin, A.; Sridhar, M.; Booth, C.; Olomolaiye, P.; Hammond, F. Medical waste management in Ibadan, Nigeria: Obstacles and Prospects. *Waste Manag.* **2009**, *29*, 804–811.
26. Longe, E.O.; Williams, A. A preliminary study of medical waste management in Lagos metropolis, Nigeria. *Iran. J. Environ. Health. Sci. Eng.* **2006**, *3*, 133–139.
27. ICRC—International Committee of the Red Cross. Medical Waste Management. 2011. Available online: <https://www.icrc.org/en/doc/assets/files/publications/icrc-002-4032.pdf> (assessed on 20 September 2022).
28. Ezirim, I.; Agbo, F. Role of national policy in improving healthcare waste management in Nigeria. *J. Health Pollut.* **2018**, *8*, 180913.
29. Denloye, A.A.; Ojuromi, O.T.; Ochei, K.; Ade-Serrano, E.A. Biosafety knowledge, waste disposal practices and identification of parasites in biomedical waste from healthcare establishments in Lagos and Abuja Nigeria. *Anim. Res. Int.* **2019**, *16*, 3144–3150.
30. Ezeoke, E.U.; Omotowo, I.B.; Ndu, A. Investigating knowledge, attitude and healthcare waste management by health workers in Nigerian tertiary health institutions. *Glob. J. Health Sci.* **2017**, *9*, 222–232.
31. Onoh, R.C.; Adeke, A.S.; Umeokonkwo, C.D.; Ekwedigwe, K.C.; Agboeze, J.; Ogah, E.O. Knowledge and practices of healthcare waste management among health workers in Lassa Fever treatment facility in Southeast Nigeria. *Niger. Med. J.* **2019**, *60*, 257–261.
32. Oke, A.O. Management of immunization solid wastes in Kano state. *Waste Manag.* **2008**, *28*, 2512–2521.
33. Oketola, A.A.; Ogundiran, M.B.; Adefolu, O.R.; Mojeed, O.A.; Itiveh, S.E. Medical waste management practices in Nigeria; The cases of Lagos and Ibadan. In Proceedings of the the 26th International Conference on solid waste technology and management, Philadelphia, PA, USA, 27–30 March 2011.
34. Iweh, M.; Ogbonna, B.; Nduka, S.; Anetoh, M.; Okonta, M. Assessment of disposal practices of expired and unused medications among community pharmacies in Anambra state, southeast Nigeria: A mixed study design. *J. Pharm. Policy Pract.* **2019**, *12*, 12.
35. LAWMA, Lagos. Statistics of Healthcare Facilities in Lagos State Accredited by LAWMA, 2020. Available online: <https://www.lawma.gov.ng/> (assessed on 27 December 2020).
36. World Health Organization. *Health Care Waste-Fact Sheet*; WHO: Geneva, Switzerland, 2018. Available online: <https://www.who.int/news-room/fact-sheets/detail/health-care-waste> (assessed on 23 December 2020).
37. WHO. *Safe Management of Waste from Healthcare Activities: A Summary*; World Health Organization: Geneva, Switzerland, 2017. Available online: <https://apps.who.int/iris/bitstream/handle/10665/259491/WHO-FWC-WSH-17.05-eng.pdf> (assessed on 22 September 2022).
38. FEPA. *Guideline for the Management of Solid Hazardous Waste in Guideline and Standards in Environmental Pollution Control in Nigeria*; FEPA: Lagos, Nigeria, 1991.
39. NESREA. National Environmental (Sanitation and Waste Control) Regulation. 2009. Available online: [https://www.nesrea.gov.ng/wp-content/uploads/2020/02/Sanitation\\_and\\_Wastes\\_Control\\_Regulations%202009.pdf](https://www.nesrea.gov.ng/wp-content/uploads/2020/02/Sanitation_and_Wastes_Control_Regulations%202009.pdf) (assessed on 2 October 2022).
40. UNEP. Municipal Solid Waste: Is it Garbage or Gold? UNEP Global Environmental Alert Series. 2013. Available online: [http://www.unep.org/pdf/UNEP\\_GEAS\\_oct\\_2013.pdf](http://www.unep.org/pdf/UNEP_GEAS_oct_2013.pdf) (assessed on 16 October 2022).
41. UN-Habitat. *Collection of Municipal Solid Waste in Developing Countries*; United Nations Human Settlements Programme (UN-Habitat): Nairobi, Kenya, 2010.
42. Federal Republic of Nigeria Official Gazette. National Environmental (Healthcare Waste Control), Regulations, 2021. Available online: <https://gazettes.africa/archive/ng/2021/ng-government-gazette-supplement-dated-2021-04-30-no-70.pdf> (assessed on 19 October 2022).
43. The National Healthcare Waste Management Plan. 2006. Available online: <https://documents1.worldbank.org/curated/ar/164291468110649200/E16340NHCWMP10Sophie0version0170April.doc> (assessed on 19 October 2022).
